# Supplementary material for: Quantitative time-resolved analysis reveals intricate, differential regulation of standard- and immuno-proteasomes
Source: eLife journal article supplement (doi:10.7554/elife.07545), 2015-09-22
Supplement: supp [file elife-07545-supp-v1.zip]

# Supplementary File 1:

## Quantitative time-resolved analysis reveals intricate, differential regulation of standard and immuno-proteasomes.

Juliane Liepe, Hermann-Georg Holzhütter, Elena Bellavista, Peter M. Kloetzel,  
Michael P. H. Stumpf, Michele Mishto

### 1 Experimental procedures

#### 1.1 20S proteasome purification and protein homogenates

20S proteasomes are purified from LcL and T2 cells as previously described (?). Lymphoblastoid cell lines (LcLs) are human B lymphocytes immortalized with Epstein Barr virus, which mainly express i-proteasomes (?). T2 cell line is a human T cell leukemia/B cell line hybrid defective in  $\beta 1i$  and  $\beta 5i$  subunits (?). Mouse proteasomes are purified from liver of adult B57CL6 mice as previously described (?). Purity of proteasome preparation has been shown in other studies (??). Cell protein homogenates are extracted from T2 cells as previously described (?).

#### 1.2 In vitro digestion of synthetic polypeptides and short fluorogenic peptides.

Synthetic polypeptides (40  $\mu$ M) and short fluorogenic peptides Suc-LLVY-, Bz-VGR- and Z-LLE-MCA are digested by 0.1 – 2  $\mu$ g purified 20S proteasomes or 5  $\mu$ g cell protein homogenates (Fig. 1- figure supplement 1B, C) in 100  $\mu$ l TEAD buffer (Tris 20 mM, EDTA 1 mM, NaN<sub>3</sub> 1 mM, DTT 1 mM, pH 7.2) over time at 37°C as previously described (??). In particular, we use: in Fig. 1A-B, Fig. 1 - figure supplement 3 and 5, Fig. 2 - figure supplement 1 and 2, Fig. 3 - figure supplement 1 - 0.12  $\mu$ g 20S mouse proteasome; in Fig. 1C, Fig. 1 - figure supplement 1A, D, E, 1  $\mu$ g 20S mouse proteasome; in Fig. 1D and Fig. 1 - figure supplement 1D-E, 2  $\mu$ g 20S mouse proteasome (i.e. 1 and 2  $\mu$ g 20S mouse proteasome for digesting substrates gp100<sub>35–57</sub> and LLO<sub>291–317</sub>, respectively); in Fig. 3 and Fig. 1 - figure supplement 4, 0.25  $\mu$ g 20S mouse proteasome; Fig. 5, Fig. 4 - figure supplement 1A, B, Fig. 5 - fig. supplement 1 0.5  $\mu$ g T2 and LcL 20S proteasomes; Fig. 4 - fig. supplement 1C and 1D 1 - 2  $\mu$ g T2 or LcL proteasome (i.e. 1 and 2  $\mu$ g 20S proteasome for digesting substrates gp100<sub>35–57</sub> and LLO<sub>291–317</sub>, respectively); All solutions are warmed at 37°C prior the beginning of the reaction. All experiments reported in this study are repeated and measured at least twice.

#### 1.3 Peptide synthesis and quantitation.

The sequence enumeration for the polypeptides gp100<sub>35–57</sub> (VSRQLRTKAWNRQLYPEWTEAQR) and LLO<sub>291–317</sub> (AYISSVAYGRQVYLKLSTNSHSTKVKA) are referred to the human protein *g100<sup>PMEL17</sup>* and the murine *Listeria monocytogenes*'s Listeriolysin O protein (LLO), respectively. Peptides referred as Rpt2 (GT-PEGLYL) and Rpt5 (KKKANLQYYA) are the C-terminal sequences of the 19S subunits Rpt2 and Rpt5, which

showed to activate the proteasome hydrolysis by opening the 20S proteasome gate (?). Peptides are synthesized using Fmoc solid phase chemistry as previously described (?). Liquid chromatography mass spectrometry (LC-MS) analyses of polypeptide digestion products are performed as previously described (?) with the ESI-ion trap instrument DECA XP MAX (ThermoFisher Scientific, USA). Database searching is performed using SpliceMets ProteaJ algorithm (?). Quantification of produced peptides - both cleavage and spliced products (?) - and computation of the substrate site-specific cleavage strength (SCS) are carried out by applying QME method to the LC-MS analyses. SCS describes the relative frequencies of proteasome cleavage after any given residue of the synthetic polypeptide substrates (?). To compute the average length of the peptides produced by the proteolysis of the synthetic polypeptides by 20S proteasomes we multiply the absolute amount of each peptide product for its number of residues and compute the average at each time point of the kinetic (Fig. 1 - figure supplement 1D-E and Fig. 4 - figure supplement 2C-D).

## 2 Mathematical modelling and model inference.

The model development is explained in the results section of the main manuscript. The mathematical models are represented by sets of ordinary differential equations (ODEs) and are shown in the following sections. We extend the ABC-SysBio software (??) to be suitable for data sets generated under different initial conditions. ABC-SysBio is applied for model selection and to estimate the model parameters. The applied algorithm in this software is approximate Bayesian computation in a sequential Monte-Carlo framework (ABC-SMC) (?). All priors and kernels are uniformly distributed. We chose a population size of 1000 parameter combinations. As distance function we use

$$d = \sum_i \frac{(x_i + x_i \epsilon - x_i^*)^2}{x_i^*}, \quad (1)$$

where  $x^*$  are the experimental measurements,  $x$  are the simulation results and  $\epsilon$  is a random variable drawn from a normal distribution with mean 0 and variance 0.1 (error term). In this way the model is fitted to the scaled mean of the experimental data under consideration of the experimental error. Latter is proportionally higher for higher measurement values. For this reason we chose the error term to be multiplicative. The variance is directly computed from the sets of repeated experiments. The ODEs are solved numerically using LSODA algorithm. For efficient simulation a CUDA implementation of LSODA is used from the package cuda-sim (?). In the following sections the species are denoted as defined in Fig. 2 - source data 3, the model parameters are defined in Fig. 2 - source data 2. The ABC-SMC algorithm results in posterior parameter distributions rather than point estimates, which provide us with parameter confidence intervals. All remaining data analysis is performed in  $R$  (?).

### 2.1 Michaelis-Menten model (MM-model)

This model is represented in Fig. 2A. We use the quasi-steady state assumption for the mathematical implementation.

$$v_{hyd} = \frac{dP}{dt} = \frac{k_p E_0 S}{K_M + S} \quad (2)$$

## 2.2 Substrate inhibition model (SI-model)

This model is represented in Fig. 2B. This model also makes use of the quasi-steady state assumption and it is an adaptation of the two-site modifier scheme by Schmidtke *et al.* (?).

$$v_{hydr} = \frac{n_a k_p E_0 S^{n_a}}{x K_{aS}} \left( 1 + \frac{\beta S^{n_i}}{\alpha K_{iS}} + \frac{\beta P^{n_i}}{\alpha K_{iP}} \right) \quad (3)$$

$$x = 1 + \frac{S^{n_a}}{K_{aS}} + \frac{S^{n_i}}{K_{iS}} + \frac{P^{n_a}}{K_{aP}} + \frac{P^{n_i}}{K_{iP}} + \frac{S^{n_a+n_i}}{\alpha K_{aS} K_{iS}} + \frac{P^{n_a+n_i}}{\alpha K_{aP} K_{iP}} + \frac{S^{n_a} P^{n_i}}{\alpha K_{aS} K_{iP}} + \frac{S^{n_i} P^{n_a}}{\alpha K_{iS} K_{aP}} \quad (4)$$

## 2.3 Dynamic regulator models

These two models are represented in Fig. 2C-D. They are based on the SI-model and extended to allow for a positive feedback loop.

$$v_{hydr} = \frac{n_a R_2 E_0 S^{n_a}}{x K_{aS}} \left( 1 + \frac{\beta S^{n_i}}{\alpha K_{iS}} + \frac{\beta P^{n_i}}{\alpha K_{iP}} \right) \quad (5)$$

$$x = 1 + \frac{S^{n_a}}{R_1 K_{aS}} + \frac{S^{n_i}}{K_{iS}} + \frac{P^{n_a}}{R_1 K_{aP}} + \frac{P^{n_i}}{K_{iP}} + \frac{S^{n_a+n_i}}{\alpha R_1 K_{aS} K_{iS}} + \frac{P^{n_a+n_i}}{\alpha R_1 K_{aP} K_{iP}} + \frac{S^{n_a} P^{n_i}}{\alpha R_1 K_{aS} K_{iP}} + \frac{S^{n_i} P^{n_a}}{\alpha K_{iS} R_1 K_{aP}}, \quad (6)$$

with  $R_1 = \frac{1}{(1+PX_{enh})}$  and  $R_2 = k_p$  for model in Fig. 3C and  $R_1 = 1$  and  $R_2 = k_p(1+PX_{enh})$  for model in Fig. 3D

## 2.4 Compartment Model

The following models are represented in Fig. 2E-J. These models have the same mathematical description for the catalytic events inside the proteasome chamber (allosteric substrate and product inhibition, see SI-model), described as follows. They differ in the mechanism of peptide transport and transport regulation.

$S$  and  $P$  denote the substrate and product concentration per proteasome chamber.

$$v_{hydr} = \frac{n_a k_p E_0 S^{n_a}}{x K_{aS}} \left( 1 + \frac{\beta S^{n_i}}{\alpha K_{iS}} + \frac{\beta P^{n_i}}{\alpha K_{iP}} \right) \quad (7)$$

$$x = 1 + \frac{S^{n_a}}{K_{aS}} + \frac{S^{n_i}}{K_{iS}} + \frac{P^{n_a}}{K_{aP}} + \frac{P^{n_i}}{K_{iP}} + \frac{S^{n_a+n_i}}{\alpha K_{aS} K_{iS}} + \frac{P^{n_a+n_i}}{\alpha K_{aP} K_{iP}} + \frac{S^{n_a} P^{n_i}}{\alpha K_{aS} K_{iP}} + \frac{S^{n_i} P^{n_a}}{\alpha K_{iS} K_{aP}} \quad (8)$$

### 2.4.1 Transport with association to the gate - no regulation

This model is represented in Fig. 2F.  $S$  and  $P$  denote the total substrate and product concentration in all proteasome chambers.

$$\frac{dS_{out}}{dt} = -S_{out}G_1k_{on} + [G_1S_{out}]k_{off} + [G_2S]v_{out} \quad (9)$$

$$\frac{dG_1}{dt} = -(S_{out} + P_{out})G_1k_{on} + ([G_1S_{out}] + [G_1P_{out}])(k_{off} + transport_{in}) \quad (10)$$

$$\frac{d[G_1S_{out}]}{dt} = S_{out}G_1k_{on} - [G_1S_{out}](k_{off} + transport_{in}) \quad (11)$$

$$\frac{dP_{out}}{dt} = -P_{out}G_1k_{on} - [G_1P_{out}]k_{off} + [G_2P]v_{out} \quad (12)$$

$$\frac{d[G_1P_{out}]}{dt} = P_{out}G_1k_{on} - [G_1P_{out}](k_{off} + transport_{in}) \quad (13)$$

$$\frac{dS_{in}}{dt} = [G_1S_{out}]transport_{in} - \tau \frac{SG_2}{E_0} - v_{hydr} \quad (14)$$

$$\frac{dP_{in}}{dt} = [G_1P_{out}]transport_{in} - \tau \frac{PG_2}{E_0} + v_{hydr} \quad (15)$$

$$\frac{dG_2}{dt} = -\tau \frac{G_2(S + P)}{E_0} + ([G_2S] + [G_2P])v_{out} \quad (16)$$

$$\frac{d[G_2S]}{dt} = \tau \frac{G_2S}{E_0} - [G_2S]v_{out} \quad (17)$$

$$\frac{d[G_2P]}{dt} = \tau \frac{G_2P}{E_0} - [G_2P]v_{out} \quad (18)$$

$$transport_{in} = v_{in} \tanh(E_0C - S - P) \quad (19)$$

#### 2.4.2 Transport with association to the gate - enhancer site outside the proteasome chamber

This model is represented in Fig. 2G and I. If  $I_{on} = 0$  the model contains no inhibitory site (Fig. 2G). If  $I_{on} > 0$  the model contains the inhibitory site outside the chamber (Fig. 2I). The enhancing regulatory site affects the terms  $transport_{in}$  and  $transport_{out}$ . The inhibitory regulatory site outside the chamber can reduce the gate opening.

$$\begin{aligned} \frac{dS_{out}}{dt} = & -S_{out}G_1k_{on} + [G_1S_{out}]k_{off} + [G_2S]transport_{out} - hS_{out}^h I_{free} I_{on} + h[IS]I_{off} \\ & - R_{on}S_{out}E_{reg} + R_{off}[E_{reg}S_{out}] \end{aligned} \quad (20)$$

$$\frac{dG_1}{dt} = -(S_{out} + P_{out})G_1k_{on} + ([G_1S_{out}] + [G_1P_{out}])(k_{off} + transport_{in}) \quad (21)$$

$$\frac{d[G_1S_{out}]}{dt} = S_{out}G_1k_{on} - [G_1S_{out}](k_{off} + transport_{in}) \quad (22)$$

$$\begin{aligned} \frac{dP_{out}}{dt} = & -P_{out}G_1k_{on} - [G_1P_{out}]k_{off} + [G_2P]transport_{out} - hP_{out}^h I_{free} I_{on} + h[IP]I_{off} \\ & - R_{on}P_{out}E_{reg} + R_{off}[E_{reg}P_{out}] \end{aligned} \quad (23)$$

$$\frac{d[G_1P_{out}]}{dt} = P_{out}G_1k_{on} - [G_1P_{out}](k_{off} + transport_{in}) \quad (24)$$

$$\frac{dS}{dt} = [G_1 S_{out}] transport_{in} - \tau \frac{SG_2}{E_0} - v_{hydr} \quad (25)$$

$$\frac{dP}{dt} = [G_1 P_{out}] transport_{in} - \tau \frac{PG_2}{E_0} + v_{hydr} \quad (26)$$

$$\frac{dG_2}{dt} = -\tau \frac{G_2(S+P)}{E_0} + ([G_2 S] + [G_2 P]) transport_{out} \quad (27)$$

$$\frac{d[G_2 S]}{dt} = \tau \frac{G_2 S}{E_0} - [G_2 S] transport_{out} \quad (28)$$

$$\frac{d[G_2 P]}{dt} = \tau \frac{G_2 P}{E_0} - [G_2 P] transport_{out} \quad (29)$$

$$\frac{dE_{reg}}{dt} = -R_{on} E_{reg} (S_{out} + P_{out}) + R_{off} ([E_{reg} S_{out}] + [E_{reg} P_{out}]) \quad (30)$$

$$\frac{d[E_{reg} S_{out}]}{dt} = R_{on} E_{reg} S_{out} - R_{off} [E_{reg} S_{out}] \quad (31)$$

$$\frac{d[E_{reg} P_{out}]}{dt} = R_{on} E_{reg} P_{out} - R_{off} [E_{reg} P_{out}] \quad (32)$$

$$\frac{dI_{free}}{dt} = -(S_{out}^h + P_{out}^h) I_{free} I_{on} + I_{off} ([IS] + [IP]) \quad (33)$$

$$\frac{d[IS]}{dt} = S_{out}^h I_{free} I_{on} - I_{off} [IS] \quad (34)$$

$$\frac{d[IP]}{dt} = P_{out}^h I_{free} I_{on} - I_{off} [IP] \quad (35)$$

$$transport_{in} = v_{in} \left( 1 + \frac{X_{enh} \frac{[E_{reg} S] + [E_{reg} P]}{2E_0}}{1 + Y_{inh} \frac{[IS] + [IP]}{I_0}} \right) \tanh(E_0 C - S - P) \quad (36)$$

$$transport_{out} = v_{out} \left( 1 + \frac{X_{enh} \frac{[E_{reg} S] + [E_{reg} P]}{2E_0}}{1 + Y_{inh} \frac{[IS] + [IP]}{I_0}} \right) \quad (37)$$

### 2.4.3 Transport with association to the gate - enhancer site inside the proteasome chamber

This model is represented in Fig. 2H and J. If  $I_{on} = 0$  the model contains no inhibitory site (Fig.2 H). If  $I_{on} > 0$  the model contains the inhibitory site outside the chamber (Fig.2J). All other model assumptions are as above.

$$\frac{dS_{out}}{dt} = -S_{out} G_1 k_{on} + [G_1 S_{out}] k_{off} + [G_2 S] transport_{out} - h S_{out}^h I_{free} I_{on} + h [IS] I_{off} \quad (38)$$

$$\frac{dG_1}{dt} = -(S_{out} + P_{out}) G_1 k_{on} + ([G_1 S_{out}] + [G_1 P_{out}]) (k_{off} + transport_{in}) \quad (39)$$

$$\frac{d[G_1 S_{out}]}{dt} = S_{out} G_1 k_{on} - [G_1 S_{out}] (k_{off} + transport_{in}) \quad (40)$$

$$\frac{dP_{out}}{dt} = -P_{out} G_1 k_{on} - [G_1 P_{out}] k_{off} + [G_2 P] transport_{out} - h P_{out}^h I_{free} I_{on} + h [IP] I_{off} \quad (41)$$

$$\frac{d[G_1 P_{out}]}{dt} = P_{out} G_1 k_{on} - [G_1 P_{out}] (k_{off} + transport_{in}) \quad (42)$$

$$\frac{dS}{dt} = [G_1 S_{out}]transport_{in} - \tau \frac{SG_2}{E_0} - v_{hydr} - R_{on} \frac{SE_{reg}}{E_0} + R_{off}[E_{reg}S] \quad (43)$$

$$\frac{dP}{dt} = [G_1 P_{out}]transport_{in} - \tau \frac{PG_2}{E_0} + v_{hydr} - R_{on} \frac{PE_{reg}}{E_0} + R_{off}[E_{reg}P] \quad (44)$$

$$\frac{dG_2}{dt} = -\tau \frac{G_2(S+P)}{E_0} + ([G_2S] + [G_2P])transport_{out} \quad (45)$$

$$\frac{d[G_2S]}{dt} = \tau \frac{G_2S}{E_0} - [G_2S]transport_{out} \quad (46)$$

$$\frac{d[G_2P]}{dt} = \tau \frac{G_2P}{E_0} - [G_2P]transport_{out} \quad (47)$$

$$\frac{dE_{reg}}{dt} = -\frac{R_{on}E_{reg}}{E_0}(S+P) + R_{off}([E_{reg}S] + [E_{reg}P]) \quad (48)$$

$$\frac{d[E_{reg}S]}{dt} = \frac{R_{on}E_{reg}}{E_0}S - R_{off}[E_{reg}S] \quad (49)$$

$$\frac{d[E_{reg}P]}{dt} = \frac{R_{on}E_{reg}}{E_0}P - R_{off}[E_{reg}P] \quad (50)$$

$$\frac{dI_{free}}{dt} = -(S_{out}^h + P_{out}^h)I_{free}I_{on} + I_{off}([IS] + [IP]) \quad (51)$$

$$\frac{d[IS]}{dt} = S_{out}^h I_{free}I_{on} - I_{off}[IS] \quad (52)$$

$$\frac{d[IP]}{dt} = P_{out}^h I_{free}I_{on} - I_{off}[IP] \quad (53)$$

$$transport_{in} = v_{in} \left( 1 + \frac{X_{enh} \frac{[E_{reg}S] + [E_{reg}P]}{2E_0}}{1 + Y_{inh} \frac{[IS] + [IP]}{I_0}} \right) \tanh(E_0 C - S - P) \quad (54)$$

$$transport_{out} = v_{out} \left( 1 + \frac{X_{enh} \frac{[E_{reg}S] + [E_{reg}P]}{2E_0}}{1 + Y_{inh} \frac{[IS] + [IP]}{I_0}} \right) \quad (55)$$

#### 2.4.4 Free transport of substrate and product

This model is represented in Fig. 2E.

$$\frac{dS_{out}}{dt} = -S_{out}transport_{in} + transport_{out}S \quad (56)$$

$$\frac{dP_{out}}{dt} = -P_{out}transport_{in} + transport_{out}P \quad (57)$$

$$\frac{dS}{dt} = S_{out}transport_{in} - transport_{out}S - v_{hydr} \quad (58)$$

$$\frac{dP}{dt} = P_{out}transport_{in} - transport_{out}P + v_{hydr} \quad (59)$$

$$transport_{in} = v_{in} \tanh(E_0 C - S - P) \quad (60)$$

$$transport_{out} = v_{out} \quad (61)$$

## 2.5 Initial conditions

The initial conditions of the following species are 0nM in all models:  $[G_1S_{out}]$ ,  $[G_1P_{out}]$ ,  $[G_2S]$ ,  $[G_2P]$ ,  $P$ ,  $P_{out}$ ,  $[E_{reg}S]$ ,  $[E_{reg}P]$ ,  $[IS]$  and  $[IP]$ .  $E_0$  is 1.66nM and 6.66nM when using mouse proteasome and human (s- and i-) proteasome, respectively. The initial conditions of  $G_1$ ,  $G_2$  and  $E_{reg}$  are  $2E_0$ . The initial condition for  $I_{free}$  is  $E_0$  (equivalent to  $I_0$ ). The initial conditions for  $S_{out}$  depend on the substrates and proteasome used. For mouse proteasome using Suc-LLVY-MCA  $S_{out}$  is 10 $\mu$ M, 20 $\mu$ M, 40 $\mu$ M, 80 $\mu$ M, 160 $\mu$ M, 240 $\mu$ M and 480 $\mu$ M for each data set, respectively. For mouse proteasome using Bz-VGR-MCA and Z-LLE-MCA  $S_{out}$  is 20 $\mu$ M, 40 $\mu$ M, 80 $\mu$ M, 160 $\mu$ M, 240 $\mu$ M, 480 $\mu$ M and 640 $\mu$ M for each data set, respectively. For human s- and i-proteasome the initial conditions for  $S_{out}$  are the same for all three substrates: 20 $\mu$ M, 40 $\mu$ M, 80 $\mu$ M, 160 $\mu$ M, 320 $\mu$ M and 640 $\mu$ M for each data set, respectively. The initial conditions of  $S$  are equivalent to those of  $S_{out}$  for non-compartmentalised models; 0nM for compartmentalised models.

## 2.6 In silico predictions

All *in silico* simulations are based on sampled parameters from the posterior parameter distribution. The open gate mutant is simulated by increasing the rates for  $v_{in}$  and  $v_{out}$  20-fold, while no more positive or negative regulation is possible ( $X_{enh} = Y_{inh} = 0$ ). Similarly we performed the *in silico* prediction with Rpt peptide. Here we increased the rates for  $v_{in}$  and  $v_{out}$  by a factor, which is calibrated for each substrate (Suc-LLVY-MCA: 5; Bz-VGR-MCA: 20; and Z-LLE-MCA: 15). The *in silico* predictions in present of the peptide LLVY are based on the posterior parameter distributions of the relevant substrate. We extend the model by adding a further species (LLVY peptide, initial condition: 50 $\mu$ M) to the system. Furthermore, species describing LLVY bound to receptors are added. The parameters for the reactions involving LLVY peptide are sampled from the posterior parameter distribution inferred from Suc-LLVY-MCA degradation kinetics. We assume no competing effects of the substrate and LLVY peptide at the gate, but for all other binding sites. For all *in silico* experiments we sample 500 parameter combinations from the posterior parameter distributions and simulate each set. Shown in this work are the means of all 500 simulations.

## 2.7 Analysis of rate limiting steps

To determine the rate limiting step of the substrate hydrolysis we need to determine the reaction to which the product formation is most sensitive. Additionally this reaction needs to have the ability not only to change the product formation, but to increase it. We simulate the model with 100 parameter combinations sampled from the corresponding posterior parameter distribution and increase a chosen reaction by a factor between 1 and 10. The resulting product formation after 60 min is then compared to the unchanged model output and the fold change in product is computed. We finally plot the mean fold change of the 100 simulations. We change the following reactions: affinity to the gate, peptide influx, hydrolysis, peptide transport inside the chamber, peptide efflux and the gate size, which controls peptide influx and efflux.

## 3 Box S1

*Peptide transport is one of the rate-limiting steps of the substrate degradation by mouse 20S proteasome.*

To understand the details of the proteolytic activity we use our fitted model and predict the proteasome dynamics for different substrate concentrations (Fig. 6 - figure supplement 1). Even though experimentally we can only observe the total amount of product produced over time (grey dots in Fig. 6 - figure supplement 1), the kinetic model now provides information about the separate steps involved in the substrate degradation. In Fig. 6 - figure supplement 1 we plot the total product concentration (Fig. 6 - figure supplement 1B), the amount of substrate and product inside the proteasome chamber over time (Fig. 6 - figure supplement 1C). For all three substrates we observe that with increasing substrate concentration the proteasome chamber fills up faster with peptides. For Z-LLE-MCA we observe a more rapid filling compared to Suc-LLVY-MCA and Bz-VGR-MCA, where the filling lasts approximately 6 hours. When plotting the amount of product inside the chamber relative to the total amount of peptides in the chamber, we find that Suc-LLVY-MCA and Bz-VGR-MCA are cleaved immediately once inside the chamber (90% of peptides are products) (Fig. 6 - figure supplement 1D). This shows that, for the substrates Suc-LLVY-MCA and Bz-VGR-MCA, the transport inside the chamber, rather than the binding to the catalytic site and the peptide-bond hydrolysis, regulates how fast these substrates are degraded. The posterior parameter distributions show that Z-LLE-MCA substrate is transported faster than Suc-LLVY-MCA and Bz-VGR-MCA (see Fig. 3 - figure supplement 1B,  $v_{in}$  and  $v_{out}$ ). This results in the rapid accumulation of Z-LLE-MCA molecules inside the proteasome chamber. Even though the catalysis rates ( $k_p$ ) of the three substrates are the same, Z-LLE-MCA hydrolysis is strongly influenced by both product and substrate inhibition (this is indicated by the very small values for the parameter  $\beta$ ). Because of that Z-LLE-MCA will be cleaved less efficiently (30 - 50%) than the other substrates (Fig. 6 - figure supplement 1D). Here modelling can elucidate those processes that are only measurable indirectly.

In summary, in light of our experiments and models the substrate transport appears to be the most important factor for controlling how fast short fluorogenic substrates are degraded by mouse 20S proteasome, and therefore it is the rate-limiting step of their hydrolysis. The hydrolysis of substrates that accumulate easily inside the proteasome chamber can be additionally influenced by strong substrate and product inhibition effects resulting in less efficient substrate degradation.

## 4 Box S2

### *Filling kinetics of the proteasome inner cavity over time.*

A key part of the peptide transport dynamics is the maximum capacity ( $C$ ) of the two proteasome ante-chambers and the main chamber.  $C$  describes the maximal number of molecules of a given substrate can be allocated inside the proteasome chamber at the same time.  $C$  is dependent on the volume of the proteasome chamber and on the volume of the substrate molecules. For this reason  $C$  is expected to be substrate specific. The model estimates of  $C$  for the three tested substrates are in agreement with values predicted by computing the maximal number of substrates that could be located inside the proteasome chamber. The estimated volumes for Suc-LLVY-MCA, Z-LLE-MCA and Bz-VGR-MCA are approx.  $936A^3$ ,  $741A^3$  and  $606A^3$ , respectively (with an MCA group of  $200A^3$ ). This results in a ratio of 1.25 for Suc-LLVY-MCA:Z-LLE-MCA (model estimate: 1.24), 1.36 for Suc-LLVY-MCA:Bz-VGR-MCA (model estimate: 1.46) and 1.08 for Z-LLE-MCA:Bz-VGR-MCA (model estimate: 1.12). The exact number of molecules inside the chamber depends on the maximum possible density, but is approximately estimated to be 250, 310 and 337 for Suc-LLVY-MCA, Z-LLE-MCA and Bz-VGR-MCA, respectively, which is in the same order of magnitude as the model estimates (200, 249 and 293). Note, computed values are the maximal possible amount of molecules that could be packed inside the chamber. However, under physiological conditions the actual number of molecules that can be filled in the proteasome

cavity has to be smaller, which is reflected in our model estimates.

## 5 Supplemental Figure Legends

### Figure 1 - figure supplement 1:

**Proteasome dynamics are not modified over time because of permanency at 37°C or product re-entry and further processing** A) Comparison of the degradation rate of the substrates Suc-LLVY-MCA (200  $\mu$ M), Bz-VGR-MCA (400  $\mu$ M) and Z-LLE-MCA (400  $\mu$ M) by 1  $\mu$ g 20S mouse proteasomes stored prior the assay at 37°C or 4°C for 18 h in the reaction buffer. Means and the SD (bars) of 2 repeated measurements of a representative assay are shown. B) The amount of product generated after 4h was measured for different initial substrate concentrations of the short fluorogenic substrates Suc-LLVY-MCA, Bz-VGR-MCA and Z-LLE-MCA by 5  $\mu$ g cell protein homogenate. C) The reaction velocity [nM/min] of the same substrates as in (B) by 5  $\mu$ g cell protein homogenate was measured over time. D-E) Percentage of substrate cleaved (D) and average number of residues of the digestion products (E) of the synthetic substrates gp100<sub>35–57</sub> and LLO<sub>291–317</sub> generated by 1  $\mu$ g 20S mouse proteasomes. Means and the SD (bars) of 2 independent experiments are shown.

### Figure 1 - figure supplement 2:

**Schematic of the substrate inhibition model. Representation of the substrate inhibition model, which is based on the 2-site modifier model originally proposed by Schmidtke *et al.* (?)**  $E$  denotes the proteasome (enzyme),  $S$  denotes the substrate,  $P$  denotes the product.  $S$  can bind to  $E$  and create a substrate-enzyme complex. A dot (.) denotes a free binding site of the proteasome. The substrate and product can bind to the catalytic site (here denoted as a dot on the right side of the  $E$ ) or to the inhibitory site (here denoted as a dot on the left side of the  $E$ ) or both. The parameters are defined in Fig. 2 - source data 2.

### Figure 1 - figure supplement 3:

**Michaelis-Menten and substrate-inhibition models do not describe the short fluorogenic peptide degradation by mouse proteasome.** A) Shown are the best possible fits of the MM-model (red) and SI-model (blue) (Fig. 2A and B, respectively) to the initial cleavage velocities in dependence of the initial substrate concentration. The substrates Suc-LLVY-MCA, Bz-VGR-MCA and Z-LLE-MCA were hydrolysed by mouse proteasome. The initial speed was estimated using linear regression over product concentrations measured at 15, 30, 45 and 60 min. Fits were obtained using ABC-SMC. B) Scatterplot of the kinetic parameters  $v_{max}$  and  $KM$  from the inferred posterior parameter distributions of the MM- (red) and SI-model (blue) using the data in (A). The point clouds demonstrate the uncertainty in the parameter estimates and their correlations. C-D) Shown are the mean (black dots) of two independent experiments (dashed dotted line) of Suc-LLVY-MCA hydrolysis over time. The data were used to calibrate the models in Fig. 2C-D (substrate inhibition model with positive feedback on binding and hydrolysis, respectively). Shown as red line is the mean time course of the calibrated model. Both models fail to represent the experimental data. In vitro digestion of substrate (its concentrations are depicted above each chart) was carried out by mouse proteasome over time. Models are described at Fig. 2C-D.

**Figure 1 - figure supplement 4:**

**Gate opening by Rpt peptides override the enhancing effect mediated by LLVY peptide.** Over time cleavage of the substrate Bz-VGR-MCA ( $200\ \mu\text{M}$ ) by  $0.25\ \mu\text{g}$  20S mouse proteasomes in presence of LLVY, Rpt2/5 or LLVY and Rpt2/5 peptides. Means and SD (bars) of repeated measurements ( $n = 2$ ) of a representative experiment are shown.

**Figure 1 - figure supplement 5:**

**Substrate inhibition effect is evident for Z-LLE-MCA degradation kinetics.** Amount of products released after cleavage of different concentrations of the substrate Z-LLE-MCA by  $0.125\ \mu\text{g}$  20S mouse proteasome. Means and SD (bars) of two independent experiments are shown.

**Figure 2 - figure supplement 1:**

**Compartmentalised models with affinity transport enhancing regulatory site(s) inside the chamber and substrate inhibitory site(s) best fit the experimental data.** Fitting of the Suc-LLVY-MCA cleavage kinetics by compartmentalised models with affinity transport (A) and enhancing regulation outside the chamber (B), inside the chamber (C), enhancing and inhibiting regulation of peptide transport inside the chamber (D) or enhancing regulation inside the chamber and inhibiting regulation of transport outside the chamber (E). *In vitro* digestion of substrate (its concentrations are depicted above each chart) was carried out by  $0.125\ \mu\text{g}$  20S mouse proteasome over time. Models are described in Fig. 2E-J. Black dashed-dotted lines are two independent experiments, black dots are their means, red and pink lines are the mean and standard deviations of the calibrated model, respectively.

**Figure 2 - figure supplement 2:**

**Compartmentalised model with affinity transport and enhancing regulatory site(s) inside the chamber and inhibiting site(s) outside the chamber fit the experimental data best.** A) Model distributions resulting from Bayesian model selection (ABC-SMC) to discriminate between the models shown in Fig. 2H and J. Data used were the cleavage kinetics of the substrate Z-LLE-MCA. B-C) Fitting of the Z-LLE-MCA cleavage kinetics by compartmentalised models with affinity transport as well as enhancing regulator site and inhibiting regulator site inside the chamber (B) or enhancing regulator site inside the chamber and inhibiting regulator site outside the chamber. *In vitro* digestion of substrate (its concentrations are depicted above each chart) was carried out by  $0.125\ \mu\text{g}$  20S mouse proteasome over time. Models are described at Fig. 2H and J. Black dashed-dotted lines are two independent experiments, black dots are their means, red and pink lines are the mean and standard deviations of the calibrated model, respectively.

**Figure 3 - figure supplement 1:**

**Compartmentalised model with affinity transport and enhancing regulatory site(s) inside the chamber and substrate inhibitory site(s) outside the chamber and its kinetic parameters.** A) Model fits of the Suc-LLVY-MCA (purple lines), Bz-VGR-MCA (blue lines) and Z-LLE-MCA (green lines) cleavage dynamics by the compartmentalised model with affinity transport as well positive regulation inside the chamber and negative regulation outside the chamber to the mean (grey dots) of two independent experiments (dashed dotted lines). *In vitro* digestion of substrate (its concentrations are depicted above each chart) was carried out by 0.125  $\mu$ g 20S mouse proteasome over time. B) Estimated model parameters related to transport, transport regulation and hydrolysis resulting from the degradation kinetics of the substrates Suc-LLVY-MCA, Bz-VGR-MCA and Z-LLE-MCA by 0.125  $\mu$ g 20S mouse proteasome. The colours correspond to the colours in (A). C) Schematic of the compartmentalised model with affinity transport as well positive regulation inside the chamber and negative regulation outside the chamber and the associated model parameters. Transport related reactions are depicted in blue, transport regulation reactions are depicted in green, hydrolysis and hydrolysis regulation related reactions are depicted in red.

**Figure 3 - figure supplement 2:**

**Compartmentalised model with affinity transport and enhancing regulatory site(s) inside the chamber and substrate inhibitory site(s) outside the chamber can simulate the different dynamics of polypeptides cleavage sites as observed in *in vitro* digestions.** A) Schematic of the hypothetical substrate with 2 cleavage sites and the possible resulting products. B-E) Shown is the relative change of the cleavage site usage for cleavage site 1 and cleavage site 2 based on *in silico* simulations of the polypeptide model with randomly sampled parameters. We used ABC-SMC for experimental design (?) in order to allow no change in the relative cleavage site usage (B), a decrease of the relative cleavage site usage for both sites (C), an increase of the relative cleavage site usage for both sites (D) or an increase at site 1 and a decrease at site 2 in the relative cleavage site usage (E).

**Figure 4 - figure supplement 1:**

**Human standard- and immuno-proteasomes vary their cleavage activities over time.** A) Cleavage velocity of T2 and LcL 20S proteasomes for the substrates Suc-LLVY-MCA, Bz-VGR-MCA and Z-LLE-MCA over time. B) Comparison of the degradation rate of the substrates Suc-LLVY-MCA (200  $\mu$ M), Bz-VGR-MCA (400  $\mu$ M) and Z-LLE-MCA (400  $\mu$ M) by LcL proteasomes stored prior the assay at 37°C or 4°C for 18 h in the reaction buffer. C) Substrate site-specific cleavage strength (SCS) for the residues Tyr<sub>298</sub>, Arg<sub>300</sub>, Val<sub>302</sub>, Ser<sub>307</sub> and Val<sub>315</sub> of the synthetic polypeptide LLO<sub>291–317</sub> by T2 and LcL proteasomes over time. D) Percentage of substrate cleaved and average number of residues (aa) of the digestion products of the synthetic substrate LLO<sub>291–317</sub> generated by T2 and LcL proteasomes. In A-D, means and the SD (bars) of 2 independent experiments are shown. A) Cleavage velocity of T2 and LcL 20S proteasomes for the substrates Suc-LLVY-MCA, Bz-VGR-MCA and Z-LLE-MCA over time. B) Comparison of the degradation rate of the substrates Suc-LLVY-MCA (200  $\mu$ M), Bz-VGR-MCA (400  $\mu$ M) and Z-LLE-MCA (400  $\mu$ M) by LcL proteasomes stored prior the assay at 37°C or 4°C for 18 h in the reaction buffer. C) Substrate site-specific cleavage strength (SCS) for the residues Tyr<sub>298</sub>, Arg<sub>300</sub>, Val<sub>302</sub>, Ser<sub>307</sub> and Val<sub>315</sub> of the synthetic polypeptide LLO<sub>291–317</sub> by T2 and LcL proteasomes over time. D) Percentage of substrate cleaved and average number of residues (aa) of the digestion products of the synthetic substrate LLO<sub>291–317</sub> generated by T2 and LcL proteasomes. In A-D, means and the SD (bars) of 2 independent experiments are shown.

**Figure 5 - figure supplement 1:**

**Fitting of experimental data using the compartmentalised models with affinity transport enhancing regulatory site(s) inside the chamber and substrate inhibitory site(s).** A-C) Fitting of the Suc-LLVY-MCA (A), Bz-VGR-MCA (B) and Z-LLE-MCA (C) cleavage kinetics. In vitro digestion of substrate (its concentrations are depicted above each chart) was carried out by 0.5  $\mu\text{g}$  20S T2 and LcL human proteasomes, respectively, over time. The model is described at Fig. 2J. Black dashed-dotted lines are two independent experiments, black dots are their means, red and pink lines are the mean and standard deviations of the calibrated model, respectively.

**Figure 6 - figure supplement 1:**

**Rate limiting steps of proteasome peptide degradation.** A) *In silico* analysis of rate-limiting steps in human s- and i-proteasome. Shown are the fold increase of product formation upon increase of a specific reaction. Substrate concentration is 80  $\mu\text{M}$ , measurement is taken after 60 min reaction. The reaction that increases the product formation strongest indicates the rate-limiting step. B) The mean of experimental data (grey dots) and the mean of simulated fits (coloured lines) is plotted over time for the degradation of Suc-LLVY-MCA, Bz-VGR-MCA and Z-LLE-MCA by mouse proteasome with varying initial substrate concentrations. C) The inferred posterior parameter distributions of each substrate were used to simulate the mean behaviour of the number of peptide molecules (product and substrate) inside each proteasome chamber over time. D) The relative amount of product compared to total amount of peptides inside the chamber over time resulting from the simulations is shown.
