# Supplementary material for: Quantitative time-resolved analysis reveals intricate, differential regulation of standard- and immuno-proteasomes
Source: eLife journal article supplement (doi:10.7554/elife.07545), 2015-09-22
Supplement: supp [file elife-07545-supp-v1.zip]

Figure 2 - source data 3:

Quantitative time-resolved analysis reveals intricate, differential  
regulation of standard and immuno-proteasomes.

Juliane Liepe, Hermann-Georg Holzhütter, Elena Bellavista, Peter M. Klotzel,  
Michael P. H. Stumpf, Michele Mishto

Table 1: List of mathematical model species

|                         |                                                                        |
|-------------------------|------------------------------------------------------------------------|
| peptide-bond hydrolysis |                                                                        |
| $E_0$                   | initial proteasome concentration                                       |
| $S$                     | substrate inside the chamber                                           |
| $P$                     | product inside the chamber                                             |
| transport               |                                                                        |
| $S_{out}$               | substrate outside the chamber                                          |
| $P_{out}$               | product outside the chamber                                            |
| $G_1$                   | proteasome gate for influx                                             |
| $G_2$                   | proteasome gate for efflux                                             |
| $[G_1 S_{out}]$         | substrate bound to proteasome gate for influx                          |
| $[G_1 P_{out}]$         | product bound to proteasome gate for influx                            |
| $[G_2 S]$               | substrate bound to proteasome gate for efflux                          |
| $[G_2 P]$               | product bound to proteasome gate for efflux                            |
| transport regulation    |                                                                        |
| $E_{reg}$               | enhancing regulator site                                               |
| $[E_{reg} S_{out}]$     | substrate bound to enhancing regulator site outside the chamber        |
| $[E_{reg} P_{out}]$     | product bound to enhancing regulator site outside the chamber          |
| $[E_{reg} S]$           | substrate bound to enhancing regulator site inside the chamber         |
| $[E_{reg} P]$           | product bound to enhancing regulator site inside the chamber           |
| $I_0$                   | initial concentration of inhibiting regulator site outside the chamber |
| $I_{free}$              | inhibiting regulator site outside the chamber                          |
| $[IS]$                  | substrate bound to inhibiting regulator site outside the chamber       |
| $[IP]$                  | product bound to inhibiting regulator site outside the chamber         |
