# Supplementary material for: Quantitative time-resolved analysis reveals intricate, differential regulation of standard- and immuno-proteasomes
Source: eLife journal article supplement (doi:10.7554/elife.07545), 2015-09-22
Supplement: supp [file elife-07545-supp-v1.zip]

Figure 2 - source data 2:

Quantitative time-resolved analysis reveals intricate, differential  
regulation of standard and immuno-proteasomes.

Juliane Liepe, Hermann-Georg Holzhütter, Elena Bellavista, Peter M. Kloetzel,  
Michael P. H. Stumpf, Michele Mishto

Table 1: List of mathematical model parameters

|                         |                                                                                     |
|-------------------------|-------------------------------------------------------------------------------------|
| peptide-bond hydrolysis |                                                                                     |
| $k_p$                   | peptide-bond hydrolysis rate at active site(s)                                      |
| $K_{aS}, K_{aP}$        | dissociation constant of substrate ( $S$ ) and product ( $P$ ) to active site(s)    |
| $n_a$                   | Hill coefficient for binding to active site(s)                                      |
| $K_{iS}, K_{iP}$        | dissociation constant of substrate ( $S$ ) and product ( $P$ ) to inhibitor site(s) |
| $n_i$                   | Hill coefficient for binding to inhibitor site(s)                                   |
| $\alpha$                | factor, by which $K_{aS}$ , $K_{aP}$ , $K_{iS}$ and $K_{iP}$ are multiplied         |
| $\beta$                 | factor, by which $k_p$ is multiplied upon binding to inhibitory site(s)             |
| transport               |                                                                                     |
| $k_{on}$                | association rate to the gate                                                        |
| $k_{off}$               | dissociation rate to from gate                                                      |
| $v_{in}$                | peptide influx rate                                                                 |
| $\tau$                  | peptide translocation rate inside the chamber                                       |
| $v_{out}$               | peptide efflux rate                                                                 |
| $C$                     | capacity (maximum number of molecules inside the chamber)                           |
| transport regulation    |                                                                                     |
| $R_{on}$                | binding rate to the enhancing regulator site(s)                                     |
| $R_{off}$               | unbinding rate to the enhancing regulator site(s)                                   |
| $X_{enh}$               | strength of enhancing regulator site(s)                                             |
| $I_{on}$                | binding rate to the inhibiting regulator site(s) outside the chamber                |
| $I_{off}$               | unbinding rate to the inhibiting regulator site(s) outside the chamber              |
| $h$                     | Hill coefficient for binding to inhibiting regulator site(s) outside the chamber    |
| $Y_{inn}$               | strength of inhibiting regulator site(s)                                            |
